# Supplementary material
Source: MDPI journal article supplement (https://www.mdpi.com/2073-4344/12/4/401)
Supplement: s1 [file s1]

## Article

# Thermocatalytic Hydrogenation of CO<sub>2</sub> to Methanol Using Cu-ZnO Bimetallic Catalysts Supported on Metal–Organic Frameworks

Zama G. Duma <sup>1,2</sup>, Xoliswa Dyosiba <sup>1</sup>, John Moma <sup>2</sup>, Henrietta W. Langmi <sup>3</sup>, Benoit Louis <sup>4</sup>, Ksenia Parkhomenko <sup>4</sup> and Nicholas M. Musyoka <sup>1,\*</sup>

- <sup>1</sup> Centre for Nanostructures and Advanced Materials (CeNAM), Chemicals Cluster, Council for Scientific and Industrial Research (CSIR), Meiring Naudé Road, Brummeria, Pretoria 0184, South Africa; zduma@csir.co.za (Z.G.D.); xdyosiba@csir.co.za (X.D.)
  - <sup>2</sup> Molecular Sciences Institute, School of Chemistry, University of the Witwatersrand, Private Bag 2001, Johannesburg, South Africa; john.moma@wits.ac.za
  - <sup>3</sup> Department of Chemistry, University of Pretoria, Private Bag X20, Hatfield 0028, South Africa; henrietta.langmi@up.ac.za
  - <sup>4</sup> Energy and Fuels for a Sustainable Environment Team, Institut de Chimie et Procédés pour l’Energie, l’Environnement et la Santé, UMR 7515 CNRS–ECPM, Université de Strasbourg, 25 rue Becquerel, 67087 Strasbourg Cedex 2 France; blouis@unistra.fr (B.L.); parkhomenko@unistra.fr (K.P.)
- \* Correspondence: nmusyoka@csir.co.za; Tel.: +27-12-841-4806

**Citation:** Duma, Z.G.; Dyosiba, X.; Moma, J.; Langmi, H.W.; Louis, B.; Parkhomenko, K.; Musyoka, N.M. Thermocatalytic Hydrogenation of CO<sub>2</sub> to Methanol Using Cu-ZnO Bimetallic Catalysts Supported on Metal–Organic Frameworks. *Catalysts* **2022**, *12*, 401. <https://doi.org/10.3390/catal12040401>

Academic Editor: Vincenzo Vaiano

Received: 4 March 2022

Accepted: 30 March 2022

Published: 5 April 2022

**Publisher’s Note:** MDPI stays neutral with regard to jurisdictional claims in published maps and institutional affiliations.

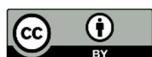

**Copyright:** © 2022 by the authors. Submitted for possible open access publication under the terms and conditions of the Creative Commons Attribution (CC BY) license (<https://creativecommons.org/licenses/by/4.0/>).

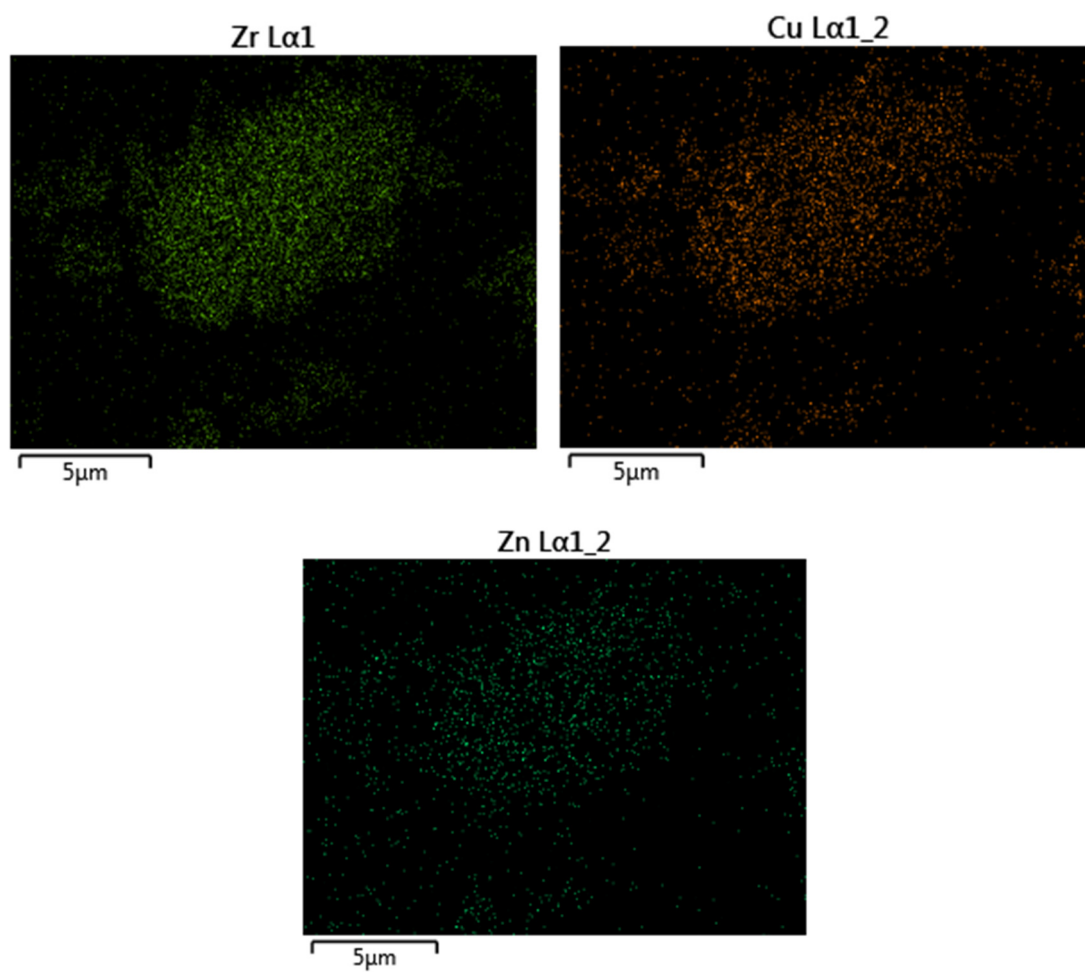

**Figure S1.** Elemental maps of Cu/ZnO/UiO-66.

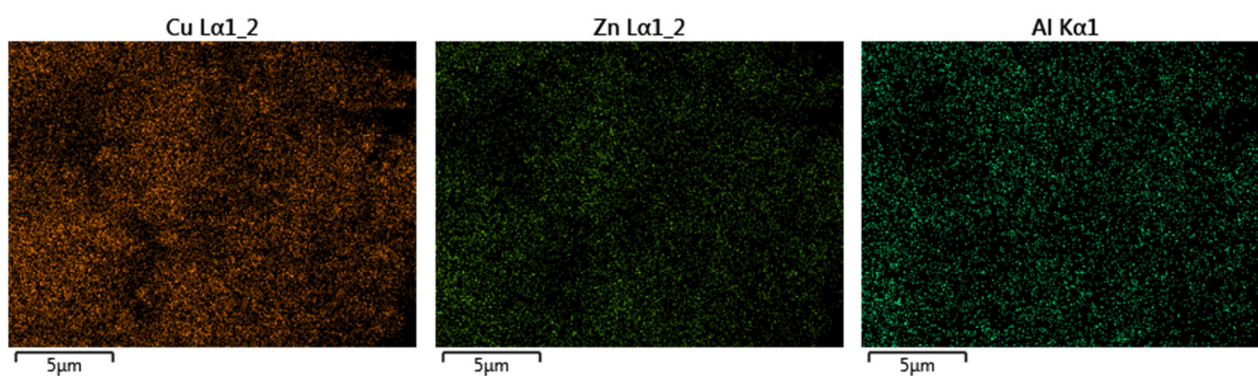

Figure S2. Elemental maps of Cu/ZnO/Al<sub>2</sub>O<sub>3</sub>/MgO catalyst.

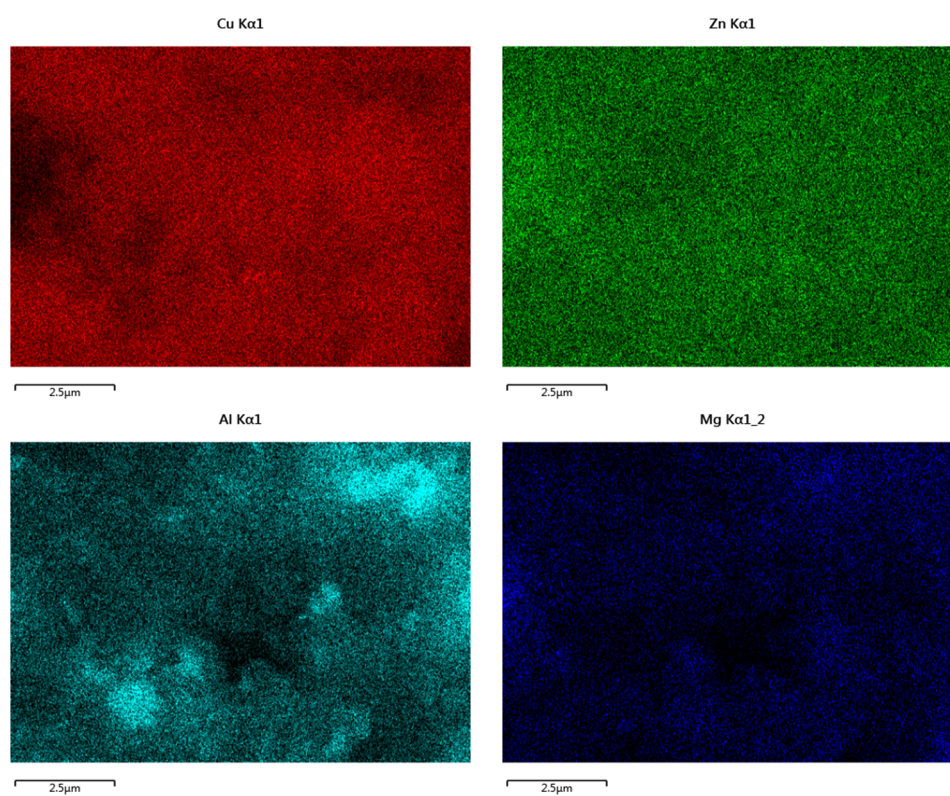

Figure S3. Elemental maps of commercial catalyst.

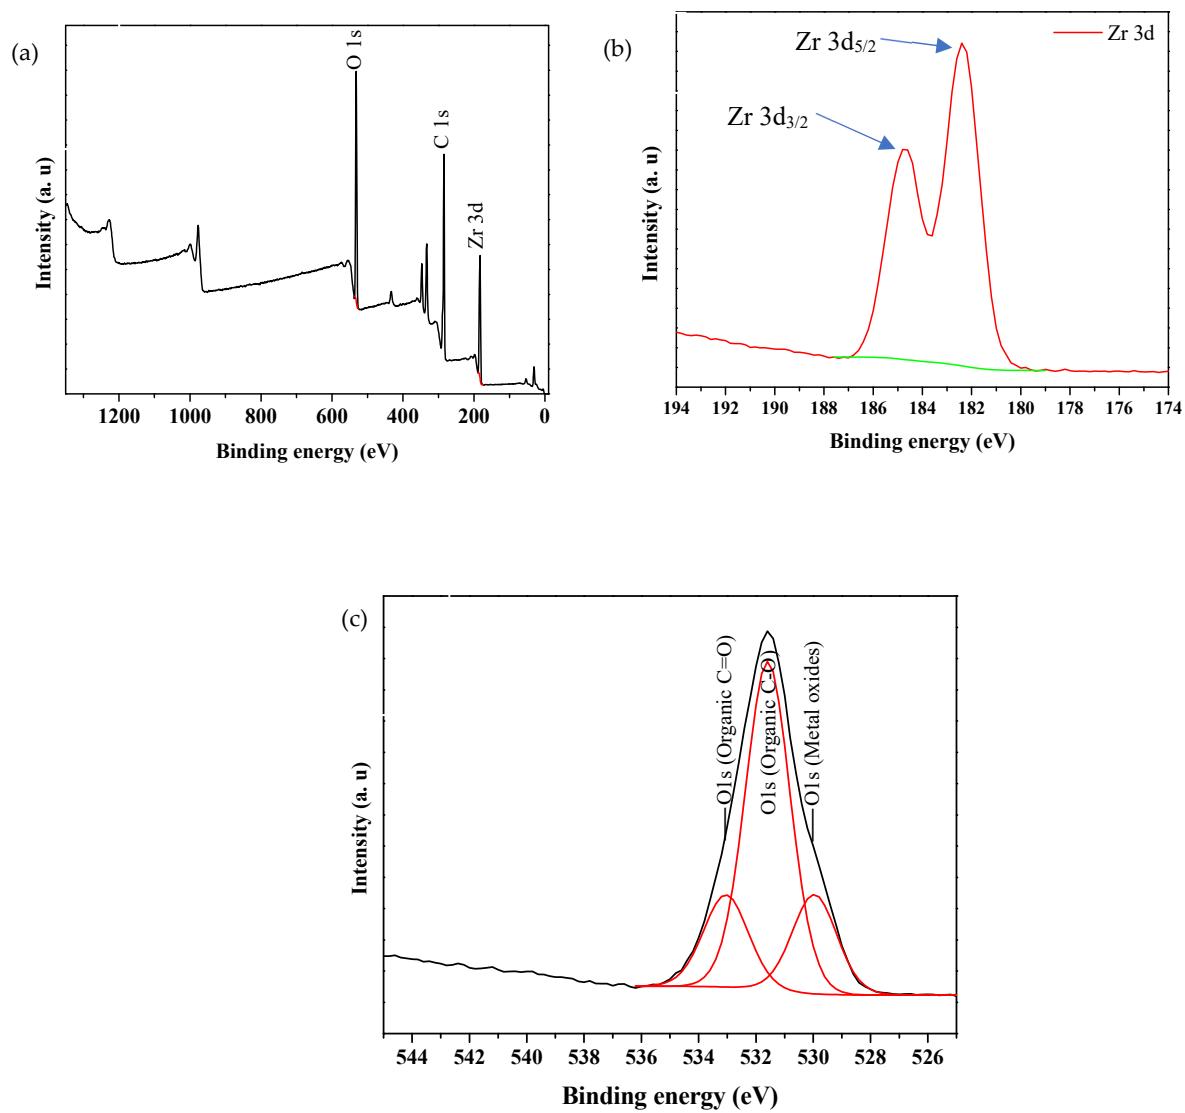

Figure S4. XPS results of UiO-66. (a) Full survey, (b) Zr3d, and O1s scan.
